# Supplementary material
Source: PubMed Central journal article supplement (PMC8139579)

S1A

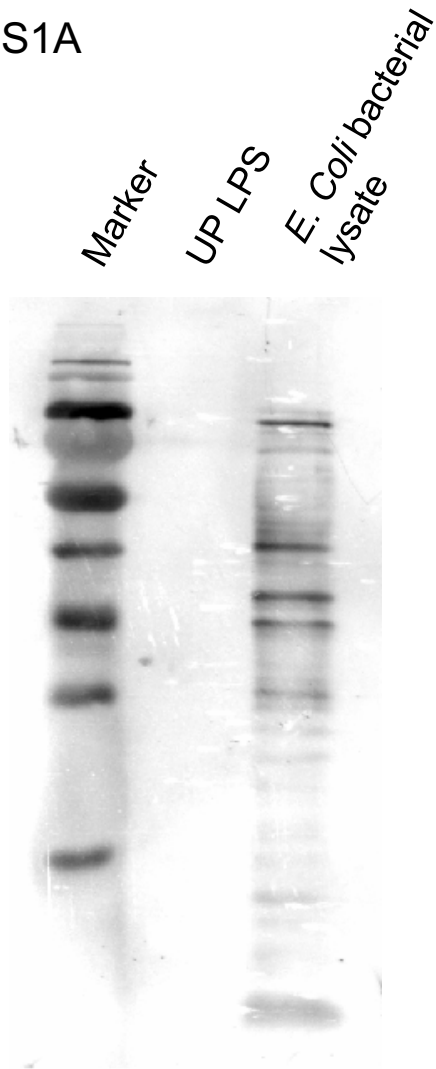

S1B

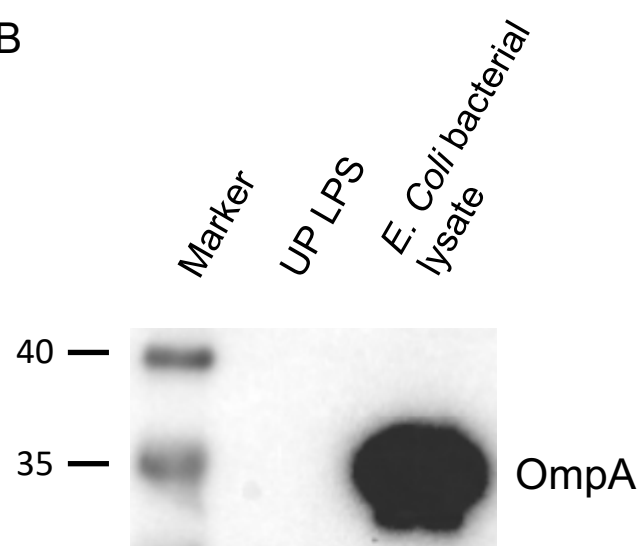

S1C

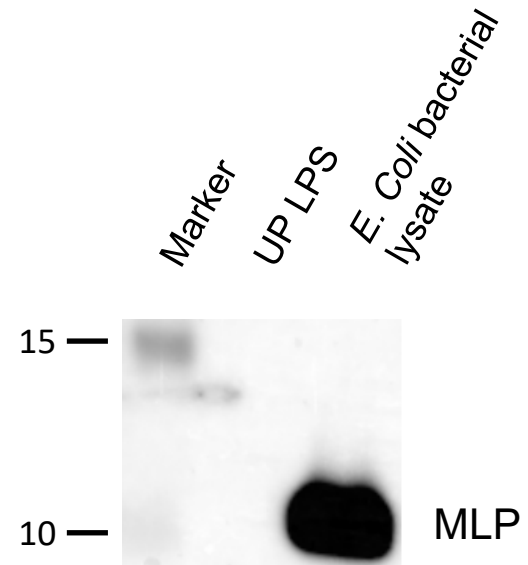

S1D

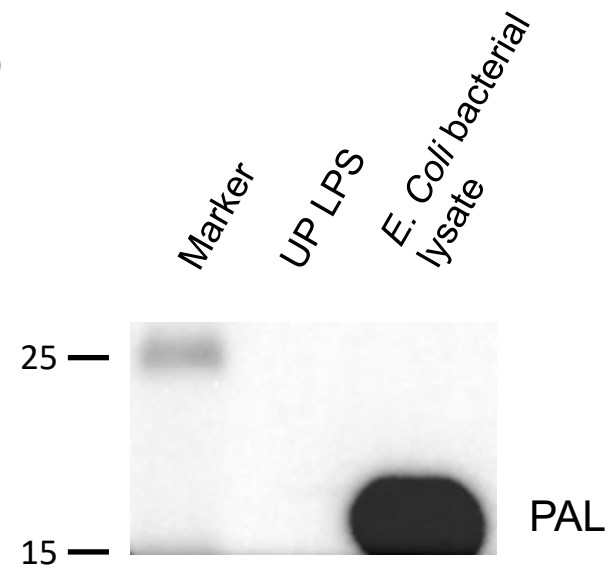

Supplement: NIHMS1699981-supplement-Supplemental_Figure_1.pdf [file NIHMS1699981-supplement-Supplemental_Figure_1.pdf]

S2A

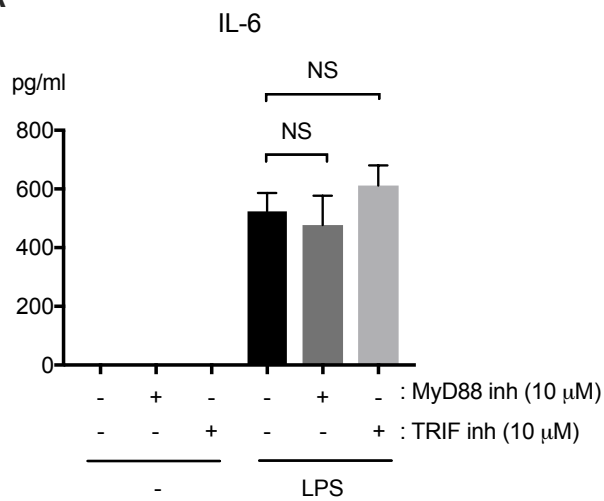

S2B

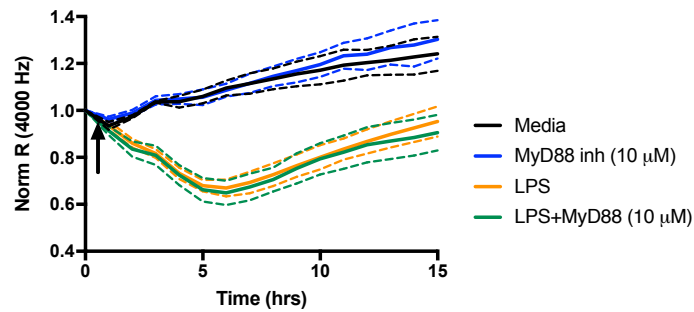

S2C

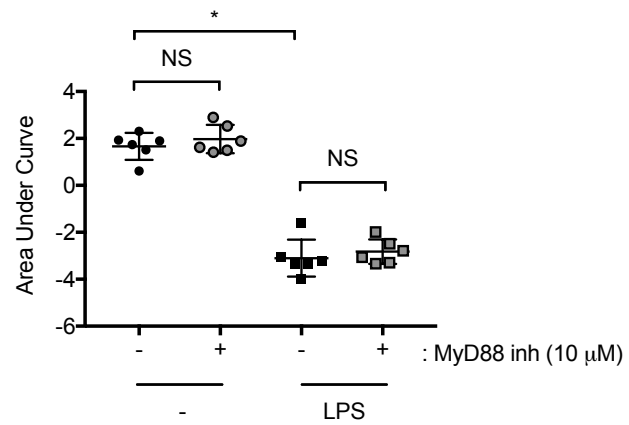

S2D

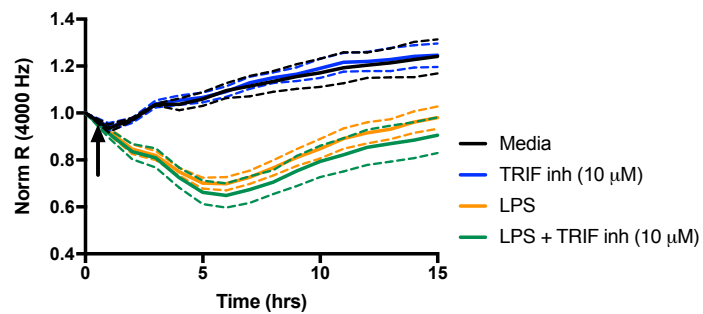

S2E

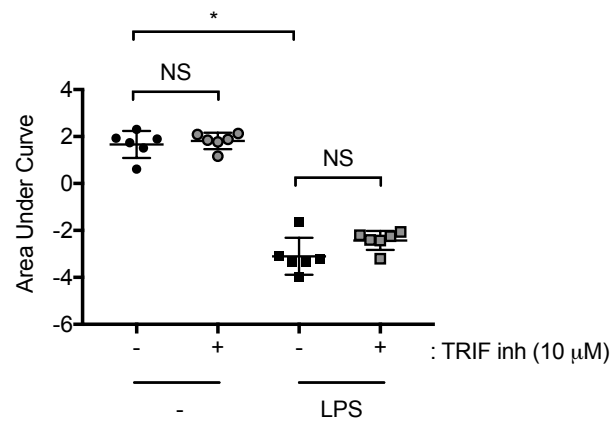

Supplement: NIHMS1699981-supplement-Supplemental_Figure_2.pdf [file NIHMS1699981-supplement-Supplemental_Figure_2.pdf]
